# Supplementary material for: Koopmans' theorem for acidic protons
Source: Royal Society of Chemistry journal article supplement (doi:10.1039/d3cc04304e), 2023-01-01
Supplement: d3cc04304e1.pdf [file d3cc04304e1.pdf]

## Supporting information for Koopmans' theorem for acidic protons

Tim Schrader,<sup>a</sup> Jamoliddin Khanifaev,<sup>a</sup> and Eva Perlt<sup>\*a</sup>

<sup>a</sup> Friedrich Schiller University Jena, Löbdergraben 32, 07743 Jena.

Fax: +49-3641-9-47792; Tel: +49-3641-9-47705; E-mail: eva.von.domaros@uni-jena.de

**Table S1** Proton orbital energies, all values in eV

| name             | $\epsilon^{\text{NEO-HF}}$ | $-\epsilon^{\text{NEO-HF,adj.}}$ |
|------------------|----------------------------|----------------------------------|
| water            | -25.10                     | 10.99                            |
| hydronium ion    | -14.11                     | 0.00                             |
| formic acid      | -23.29                     | 9.18                             |
| acetic acid      | -23.75                     | 9.64                             |
| n-propionic acid | -23.79                     | 9.69                             |
| n-butyric acid   | -23.82                     | 9.71                             |
| isobutyric acid  | -23.81                     | 9.70                             |
| n-hexanoic acid  | -23.83                     | 9.73                             |
| n-octanoic acid  | -23.84                     | 9.73                             |
| n-decanoic acid  | -23.84                     | 9.74                             |
| phenol           | -24.27                     | 10.17                            |
| p-toluic acid    | -23.79                     | 9.68                             |
| glycine          | -23.62                     | 9.51                             |
| oxalic acid      | -22.97                     | 8.86                             |
| pyruvic acid     | -23.23                     | 9.13                             |

**Table S2** Relative (see Eq. 1 in the main article) and absolute energies of the HF calculations without COSMO, all values in eV

| name             | $\Delta H_{\text{acid}}^{\text{HF}}$ | $E_{\text{HF}}$ | $E_{\text{HF}}$<br>of anion |
|------------------|--------------------------------------|-----------------|-----------------------------|
| water            |                                      | -2069.69        |                             |
| hydronium ion    |                                      | -2077.32        |                             |
| formic acid      | 7.75                                 | -5138.68        | -5123.31                    |
| acetic acid      | 8.14                                 | -6201.82        | -6186.05                    |
| n-propionic acid | 8.09                                 | -7264.35        | -7248.63                    |
| n-butyric acid   | 8.09                                 | -8326.91        | -8311.20                    |
| isobutyric acid  | 8.06                                 | -8326.90        | -8311.20                    |
| n-hexanoic acid  | 8.11                                 | -10452.05       | -10436.32                   |
| n-octanoic acid  | 8.10                                 | -12577.16       | -12561.43                   |
| n-decanoic acid  | 8.10                                 | -14702.27       | -14686.54                   |
| phenol           | 8.23                                 | -8317.93        | -8302.07                    |
| p-toluic acid    | 7.87                                 | -12450.29       | -12434.79                   |
| glycine          | 7.96                                 | -7699.71        | -7684.13                    |
| oxalic acid      | 7.24                                 | -10246.12       | -10231.26                   |
| pyruvic acid     | 7.45                                 | -9270.25        | -9255.18                    |

**Table S3** Relative (see Eq. 1 in the main article) and absolute energies of the DFT calculations without COSMO, all values in eV

| name             | $\Delta H_{\text{acid}}^{\text{DFT}}$ | $E_{\text{DFT}}$ | $E_{\text{DFT}}$<br>of anion |
|------------------|---------------------------------------|------------------|------------------------------|
| water            |                                       | -2079.68         |                              |
| hydronium ion    |                                       | -2087.13         |                              |
| formic acid      | 7.66                                  | -5163.51         | -5148.40                     |
| acetic acid      | 8.02                                  | -6233.53         | -6218.05                     |
| n-propionic acid | 7.95                                  | -7303.01         | -7287.60                     |
| n-butyric acid   | 7.94                                  | -8372.53         | -8357.13                     |
| isobutyric acid  | 7.90                                  | -8372.54         | -8357.19                     |
| n-hexanoic acid  | 7.96                                  | -10511.57        | -10496.16                    |
| n-octanoic acid  | 7.95                                  | -12650.59        | -12635.18                    |
| n-decanoic acid  | 7.95                                  | -14789.61        | -14774.20                    |
| phenol           | 8.05                                  | -8365.59         | -8350.09                     |
| p-toluic acid    | 7.74                                  | -12519.79        | -12504.60                    |
| glycine          | 7.79                                  | -7739.48         | -7724.24                     |
| oxalic acid      | 7.15                                  | -10294.84        | -10280.24                    |
| pyruvic acid     | 7.32                                  | -9316.89         | -9302.12                     |

**Table S4** Relative (see Eq. 1 in the main article) and absolute energies of the DFT calculations with COSMO, all values in eV

| name             | $\Delta H_{\text{acid}}^{\text{DFT-COSMO}}$ | $E_{\text{DFT}}$ | $E_{\text{DFT}}$<br>of anion |
|------------------|---------------------------------------------|------------------|------------------------------|
| water            |                                             | -2080.00         |                              |
| hydronium ion    |                                             | -2091.15         |                              |
| formic acid      | 1.32                                        | -5163.98         | -5151.52                     |
| acetic acid      | 1.56                                        | -6233.86         | -6221.16                     |
| n-propionic acid | 1.56                                        | -7303.33         | -7290.62                     |
| n-butyric acid   | 1.57                                        | -8372.85         | -8360.13                     |
| isobutyric acid  | 1.57                                        | -8372.86         | -8360.14                     |
| n-hexanoic acid  | 1.60                                        | -10511.90        | -10499.15                    |
| n-octanoic acid  | 1.60                                        | -12650.92        | -12638.17                    |
| n-decanoic acid  | 1.60                                        | -14789.95        | -14777.19                    |
| phenol           | 1.96                                        | -8365.88         | -8352.78                     |
| p-toluic acid    | 1.51                                        | -12520.14        | -12507.49                    |
| glycine          | 1.53                                        | -7739.94         | -7727.26                     |
| oxalic acid      | 1.08                                        | -10295.42        | -10283.20                    |
| pyruvic acid     | 1.17                                        | -9317.34         | -9305.01                     |

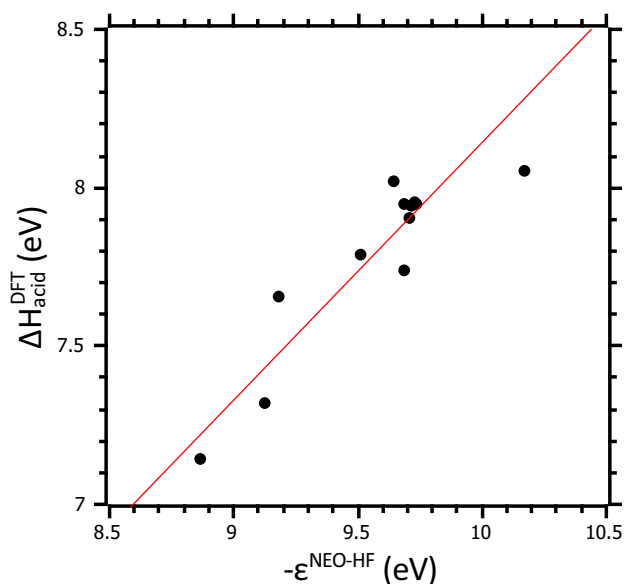

**Fig. S1** Adjusted negative NEO-HF proton orbital energies  $-\epsilon^{\text{NEO-HF}}$  correlate with the reaction enthalpy of deprotonation  $\Delta H_{\text{acid}}^{\text{DFT}}$  as calculated at the B3-LYP/def2-TZVP level without COSMO. The NEO-Koopmans' correction factor is  $0.814 \pm 0.003$ , assuming an intercept of 0 eV.

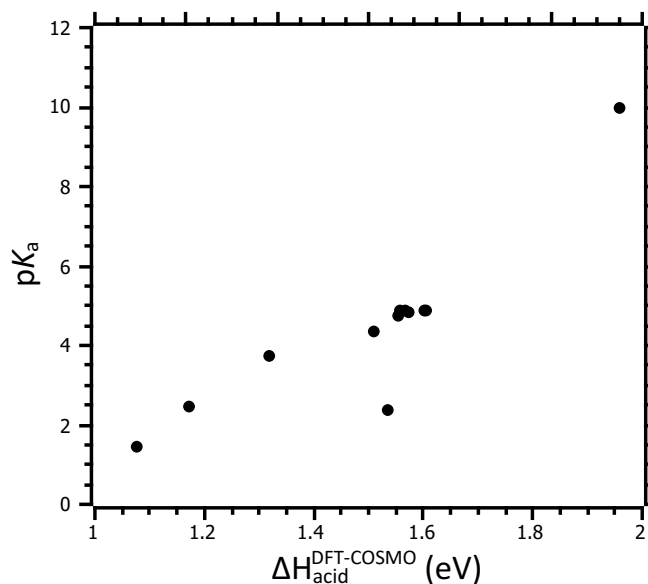

**Fig. S2**  $\Delta H_{\text{acid}}^{\text{DFT-COSMO}}$  calculated with COSMO correlate well with the negative  $\text{p}K_{\text{a}}$

**Table S5** Experimental  $\text{p}K_{\text{a}}$  values, the proton orbital energies and enthalpy of deprotonation

| name             | $-\epsilon^{\text{NEO-HF,adj.}}$<br>(eV) | $\Delta H_{\text{acid}}$<br>with COSMO<br>(eV) | $\text{p}K_{\text{a}}$ |
|------------------|------------------------------------------|------------------------------------------------|------------------------|
| formic acid      | 9.18                                     | 1.32                                           | 3.742 <sup>1</sup>     |
| acetic acid      | 9.64                                     | 1.56                                           | 4.756 <sup>2</sup>     |
| n-propionic acid | 9.69                                     | 1.56                                           | 4.88 <sup>3</sup>      |
| n-butyric acid   | 9.71                                     | 1.57                                           | 4.82 <sup>4</sup>      |
| isobutyric acid  | 9.70                                     | 1.57                                           | 4.86 <sup>5</sup>      |
| n-hexanoic acid  | 9.73                                     | 1.60                                           | 4.88 <sup>6</sup>      |
| n-octanoic acid  | 9.73                                     | 1.60                                           | 4.895 <sup>7</sup>     |
| n-decanoic acid  | 9.74                                     | 1.60                                           | 4.9 <sup>8</sup>       |
| phenol           | 10.17                                    | 1.96                                           | 9.99 <sup>5</sup>      |
| p-toluic acid    | 9.68                                     | 1.51                                           | 4.34 <sup>9,10</sup>   |
| glycine          | 9.51                                     | 1.53                                           | 2.37 <sup>11</sup>     |
| oxalic acid      | 8.86                                     | 1.08                                           | 1.46 <sup>12</sup>     |
| pyruvic acid     | 9.13                                     | 1.17                                           | 2.45 <sup>11</sup>     |

## REFERENCES

- 1 L. Settimo, K. Bellman and R. M. A. Knegtel, *Pharm Res*, 2014, **31**, 1082–1095.
- 2 W. M. Haynes, *CRC Handbook of Chemistry and Physics*, 95th Edition, CRC Press, 95th edn, 2014.
- 3 K. G. Latham, A. Ferguson and S. W. Donne, *SN Appl. Sci.*, 2019, **1**, 54.
- 4 *Physikalische Chemie. Hauptbd.*, ed. P. W. Atkins, Wiley-VCH, 4th edn, 2012.
- 5 *CRC handbook of tables for organic compound identification*, ed. Z. Rappoport, CRC Press, 3rd edn, 1985.
- 6 J. A. Riddick, W. B. Bunger and T. K. Sakano, *Organic solvents: physical properties and methods of purification*, J. Wiley & sons, 4th edn, 1986.
- 7 G. W. Gokel and J. A. Dean, *Dean's handbook of organic chemistry*, McGraw-Hill, 2nd edn, 2004.
- 8 M. Barratt, *Toxicology in Vitro*, 1996, **10**, 85–94.
- 9 R. Williams, W. Jencks and F. Westheimer, *Hans Reich's Collection. Bordwell pKa Table. pKa Values in Water Compilation*. (accessed October 2023), <https://organicchemistrydata.org/hansreich/resources/pka/>.
- 10 F. C. Nachod and J. J. Zuckerman, *Determination of organic structures by physical methods. Vol. 4*, Academic Press, 1971.
- 11 G. Kortum, W. Vogel, K. Andrussov and International Union of Pure and Applied Chemistry Commission on Electrochemical Data, *Dissociation constants of organic acids in aqueous solution*, Butterworths London, 1961.
- 12 G. Clayton, *Patty's industrial hygiene and toxicology. 2,A: Toxicology*, Wiley, 3rd edn, 1981.
